# Supplementary material for: Structural Analysis and Stochastic Modelling Suggest a Mechanism for Calmodulin Trapping by CaMKII
Source: PubMed Central journal article supplement (PMC3261145; doi:10.1371/journal.pone.0029406), 2012-01-18
Supplement: pone.0029406.s001.pdf [file pone.0029406.s001.pdf]

Table S3: **List of reactions for small model of calmodulin binding and subunit opening to determine opening probability.**

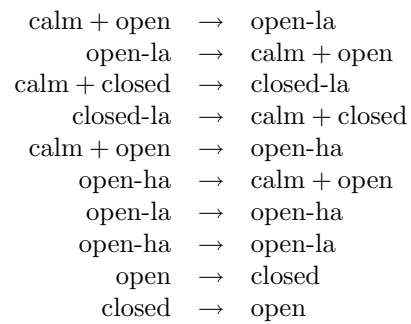

List of reactions for small model of calmodulin binding and subunit opening to determine opening probability. Here, “calm” denotes calmodulin, “closed” the closed form of a CaMKII subunit, “open” the open form, and “open-la”, “closed-la” and “open-ha” denote the open or closed for of CaMKII bound to calmodulin at the low-affinity or high-affinity binding site, respectively.
